# Supplementary material for: Ultrahigh-rate nickel monosulfide anodes for sodium/potassium-ion storage
Source: Royal Society of Chemistry journal article supplement (doi:10.1039/d1nr02133h), 2021-01-01
Supplement: d1nr02133h1.pdf [file d1nr02133h1.pdf]

Supporting Information

**Ultrahigh-rate nickel monosulfide anodes for sodium/potassium-ion  
storage**

Milan K. Sadan<sup>a</sup>, Huihun Kim<sup>a</sup>, Changhyeon Kim<sup>a</sup>, Gyu-Bong Cho<sup>b</sup>, Kwon-Koo Cho<sup>b</sup>, Jou-  
Hyeon Ahn<sup>b\*</sup>, and Hyo-Jun Ahn<sup>b\*</sup>

*<sup>a</sup>Research Institute for Green Energy Convergence Technology, Gyeongsang National  
University, Jinju 52828, Republic of Korea*

*<sup>b</sup>Department of Materials Engineering and Convergence Technology, RIGET, Gyeongsang  
National University, Jinju 52828, Republic of Korea*

\*Corresponding authors

E-mail addresses: ahj@gnu.ac.kr (HJA) and jhahn@gnu.ac.kr (JHA)

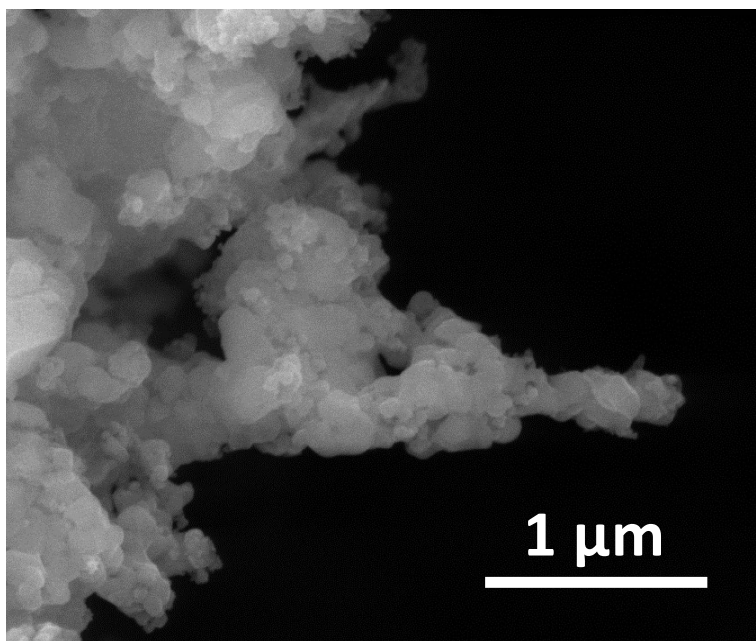

**Fig. S1** Field-emission scanning electron microscopy (FESEM) image of nickel monosulfide (NiS) nanoparticles.

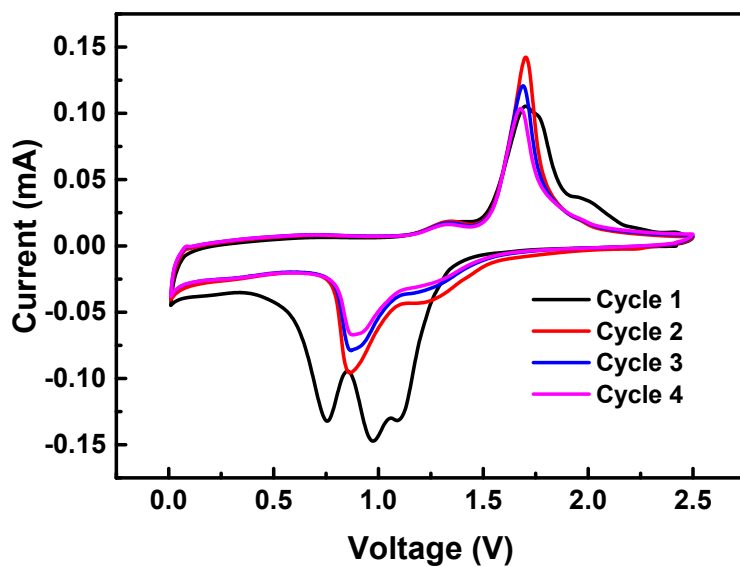

**Fig. S2** Cyclic voltammograms of the NiS electrode in a carbonate electrolyte at a scan rate of  $0.1 \text{ mV s}^{-1}$  for sodium ion batteries.

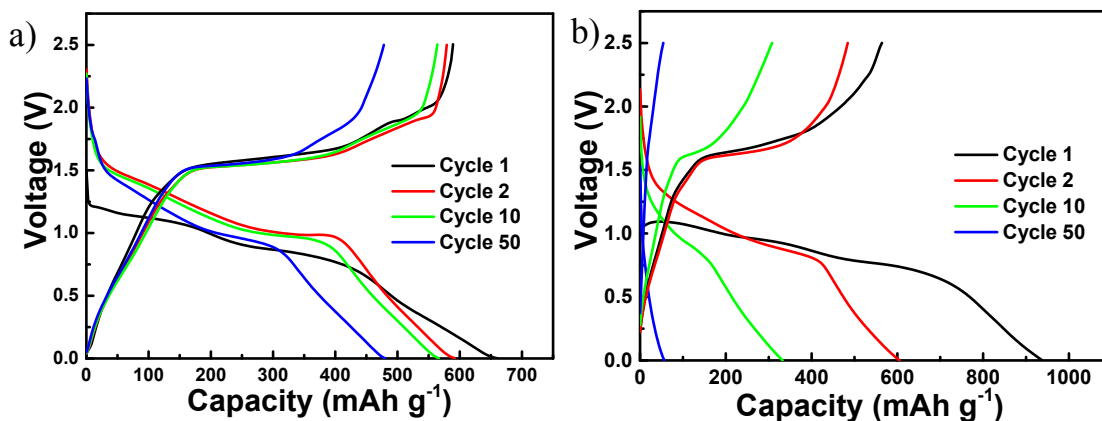

**Fig. S3** Voltage profiles of the NiS electrode recorded in a) ether and b) carbonate electrolytes at a current density of 1 A g<sup>-1</sup> for sodium ion batteries.

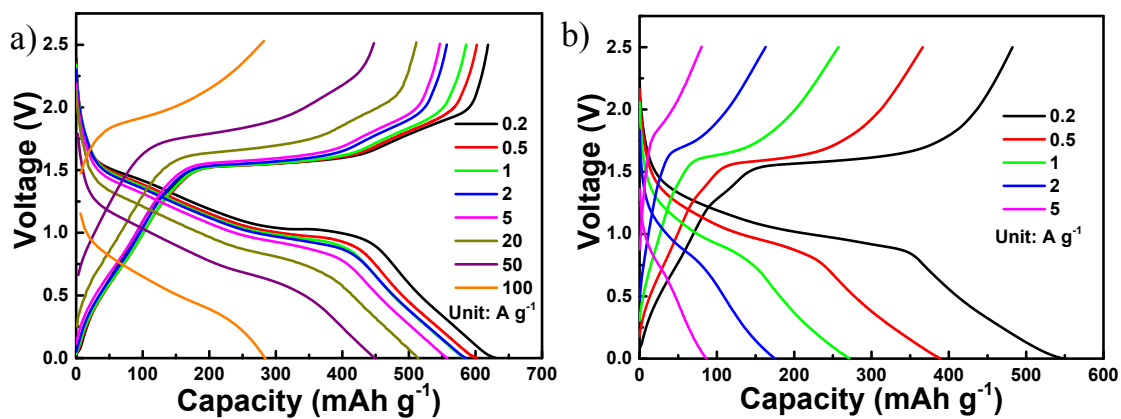

**Fig. S4** Voltage profiles reflecting the rate performances of the NiS electrode in a) ether and b) carbonate electrolytes for sodium ion batteries.

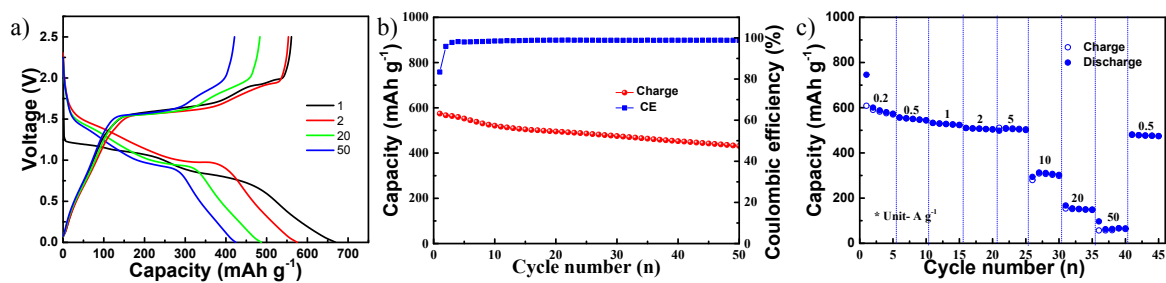

**Fig. S5** a) Voltage profiles and b) corresponding cycling performance and c) rate performance of the NiS electrode with high loading (2.54 g/cm<sup>2</sup>) in sodium ion batteries.

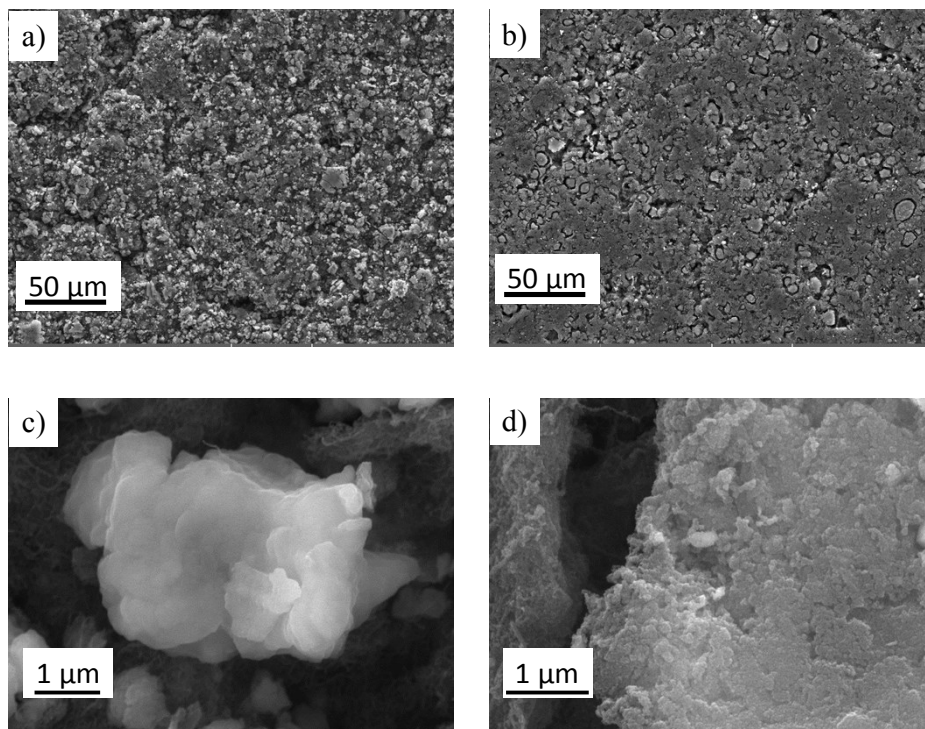

**Fig. S6** FESEM images of the NiS electrode obtained after cycling in a,c) carbonate and b,d) ether electrolytes for sodium ion batteries.

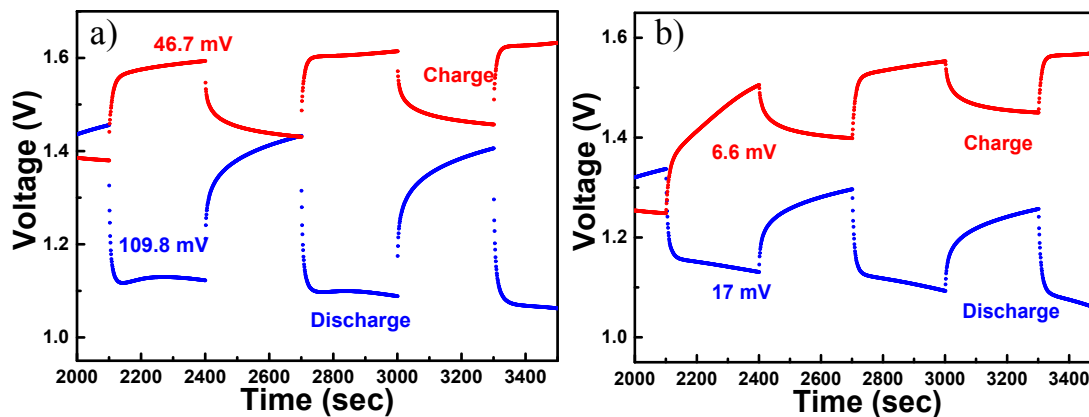

**Fig. S7** Galvanostatic intermittent titration technique (GITT) profiles of the NiS electrode recorded in a) carbonate and b) ether electrolytes for sodium ion batteries.

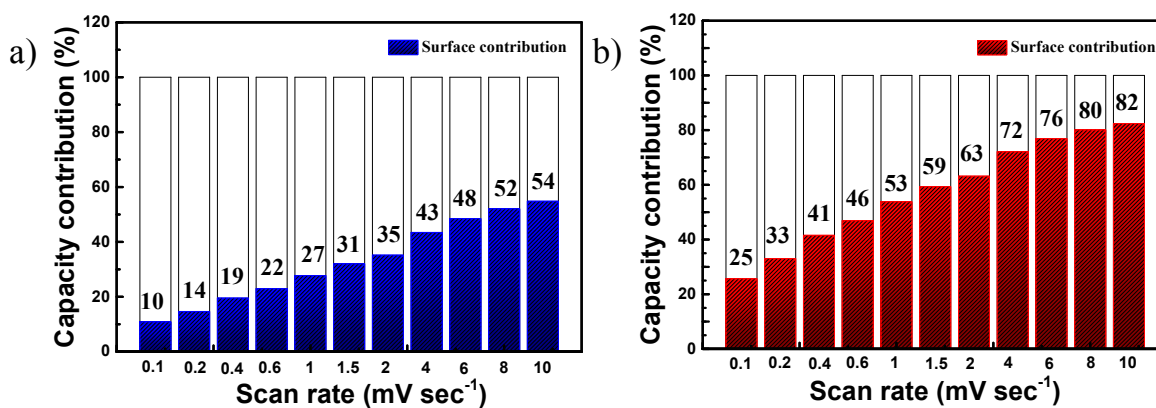

**Fig. S8** The contribution ratio of diffusion-controlled and surface-controlled behavior at different scan rates in both a) carbonate and b) ether electrolytes for sodium ion batteries.

**Table S1** Comparison of the results obtained in this work with those of the previous studies on NiS

| Sl. No. | Electrode               | Electrolyte                                     | Carbon Content (%) | Current collector | First reversible capacity (mAh g <sup>-1</sup> ) | Initial coulombic efficiency (%) | Rate performance (mAh g <sup>-1</sup> ) | Ref |
|---------|-------------------------|-------------------------------------------------|--------------------|-------------------|--------------------------------------------------|----------------------------------|-----------------------------------------|-----|
| 1       | NiS plates              | 1 M NaClO <sub>4</sub> in PC + 5 % FEC          | 38                 | Cu                | 381 (1A g <sup>-1</sup> )                        | 49                               | 43 (10 A g <sup>-1</sup> )              | S1  |
| 2       | NiS spheres             | 1 M NaClO <sub>4</sub> in PC + 5 % FEC          | Not mentioned      | Cu                | 683 (0.1 A g <sup>-1</sup> )                     | 73                               | 337 (5 A g <sup>-1</sup> )              | S2  |
| 3       | CNT@NiS/C               | 1 M NaClO <sub>4</sub> in EC/DEC                | 35                 | Cu                | 418 (0.1 A g <sup>-1</sup> )                     | 60                               | —                                       | S3  |
| 4       | NiS/2D nanosheet        | 1 M NaClO <sub>4</sub> in EC/PC + 5 % FEC       | 36                 | Cu                | 544 (0.2 A g <sup>-1</sup> )                     | 77.2                             | 393 (2 A g <sup>-1</sup> )              | S4  |
| 5       | Hollow NiS @CNF         | 1 M NaCF <sub>3</sub> SO <sub>3</sub> in EC/DEC | 25.1               | Cu                | 324.4 (1 A g <sup>-1</sup> )                     | 71.2                             | 274.7 (5 A g <sup>-1</sup> )            | S5  |
| 6       | acicular NiS-Ni         | 1 M NaPF <sub>6</sub> in EC/DEC/DMC + 5% FEC    | —                  | Ni                | 813.6 (0.1 A g <sup>-1</sup> )                   | 59.2                             | 332.3 (0.4 A g <sup>-1</sup> )          | S6  |
| 7       | NiS/MoS <sub>2</sub> /C | 1 M NaClO <sub>4</sub> in EC/DMC + 5% FEC       | 7.4                | Cu                | 571 (0.1 A g <sup>-1</sup> )                     | 80.2                             | 398 (5 A g <sup>-1</sup> )              | S7  |
| 8       | NiS/C flower            | 1 M NaClO <sub>4</sub> in DEGDME                | Not mentioned      | Cu                | 776 (0.1 A g <sup>-1</sup> )                     | 74                               | 110 (3 A g <sup>-1</sup> )              | S8  |
| 9       | NiS nanoneedles         | 1 M NaPF <sub>6</sub> in DME                    | 3                  | Cu                | 597 (0.1 A g <sup>-1</sup> )                     | 93                               | 320 (20 A g <sup>-1</sup> )             | S9  |
| 10      | NiS@N doped C           | 1 M NaClO <sub>4</sub> in EC/DEC + 5% FEC       | 17.2               | Not mentioned     | 824 (0.1 A g <sup>-1</sup> )                     | —                                | 688(3.2 A g <sup>-1</sup> )             | S10 |

|    |                  |                              |                        |                           |    |                              |             |
|----|------------------|------------------------------|------------------------|---------------------------|----|------------------------------|-------------|
| 11 | NiS nanoparticle | 1 M NaPF <sub>6</sub> in DME | Carbon coated Aluminum | 589 (1A g <sup>-1</sup> ) | 89 | 286 (100 A g <sup>-1</sup> ) | This report |
|----|------------------|------------------------------|------------------------|---------------------------|----|------------------------------|-------------|

NaClO<sub>4</sub>: Sodium perchlorate, NaCF<sub>3</sub>SO<sub>3</sub>: Sodium trifluoromethanesulfonate, NaPF<sub>6</sub>: Sodium hexafluorophosphate, PC: Propylene carbonate, EC: Ethylene carbonate, FEC: Fluoroethylene carbonate, DEC: Diethyl carbonate, DMC: Dimethyl carbonate, DEGDM: diglycol methyl ether, DME: dimethyl ether.

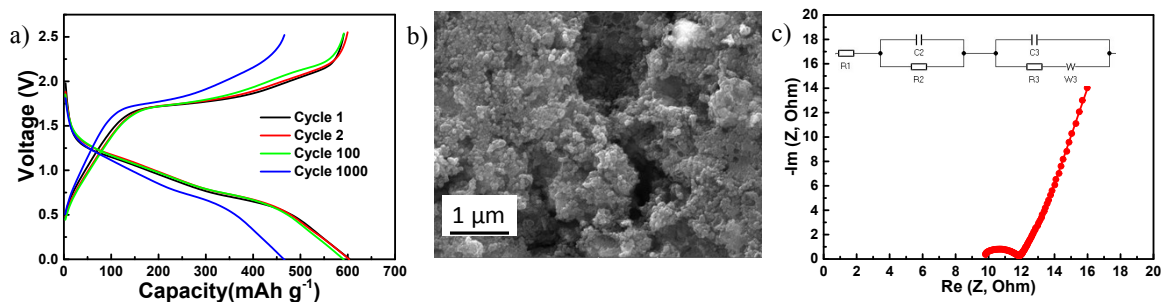

**Fig. S9** a) Voltage profiles recorded during cycling at a current density of 25 A g<sup>-1</sup>. b) FESEM image and c) Nyquist plot of the NiS electrode after 1000 cycles for sodium ion batteries.

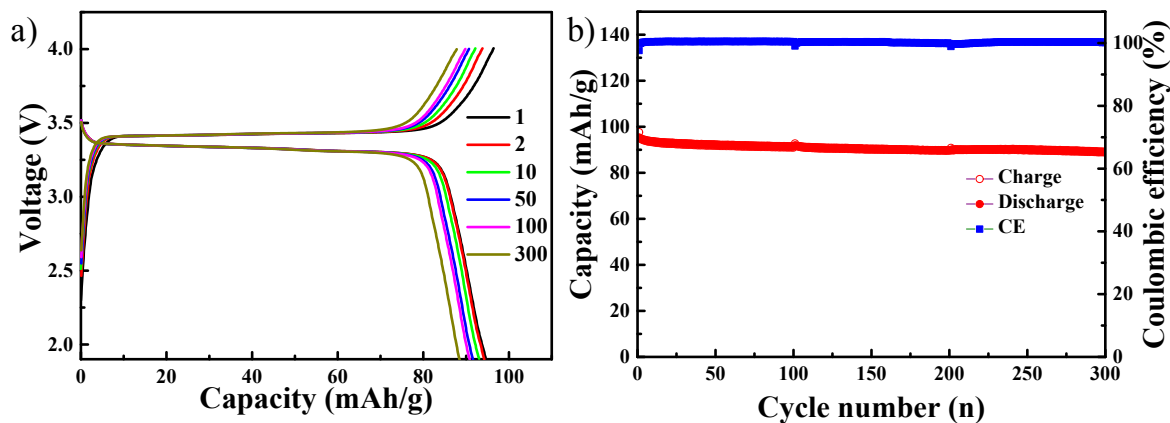

**Fig. S10** a) Voltage profile and corresponding cycling performance of NVP cathode at current density of 1.17 A g<sup>-1</sup>.

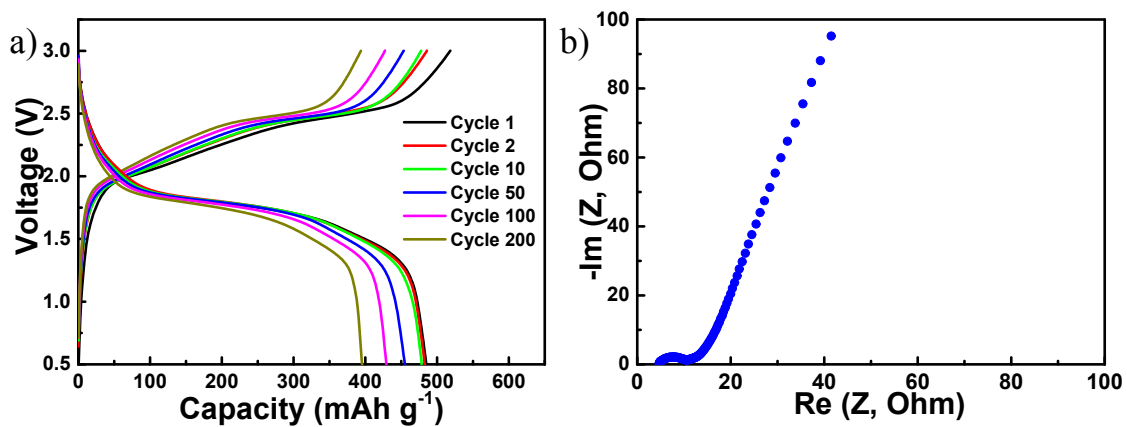

**Fig. S11** a) Voltage profiles recorded during cycling at 2 A g<sup>-1</sup>. b) Electrochemical impedance spectrum obtained after cycling the Na<sub>3</sub>V<sub>2</sub>(PO<sub>4</sub>) (NVP)/NiS full-cell.

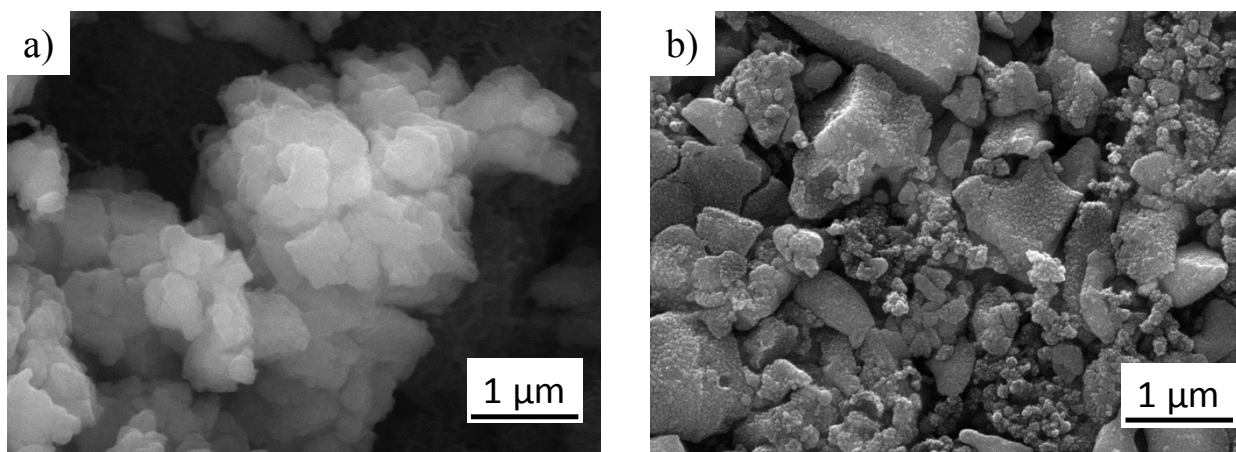

**Fig. S12** FESEM images of the a) NiS anode and b) NVP cathode after cycling.



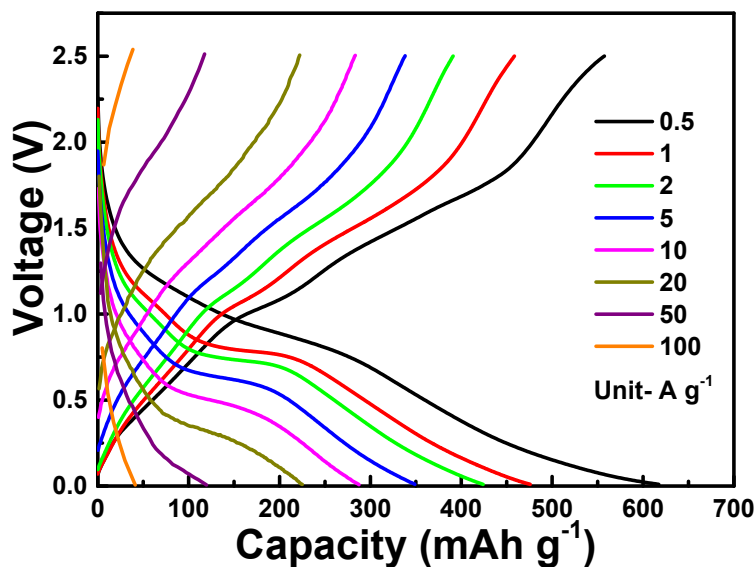

**Fig. S13** Voltage profiles presenting the rate performance of the NiS electrode in a potassium-ion battery.

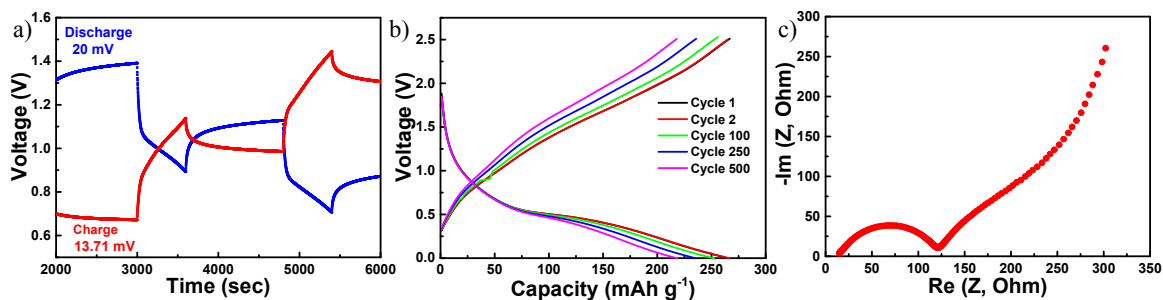

**Fig. S14** a) GITT profiles, b) voltage profiles recorded during cycling at a current rate of  $10 \text{ A g}^{-1}$ , and c) Nyquist plot obtained after the long-term cycling of the NiS electrode in a potassium-ion battery.

## References

S1. H. Fan, H. Yu, X. Wu, Y. Zhang, Z. Luo, H. Wang, Y. Guo, S. Madhavi and Q. Yan, *ACS Appl Mater Interfaces.*, 2016, **8**, 25261-25267. <https://doi.org/10.1021/acsami.6b07300>.

- S2. D. Zhang, W. Sun, Y. Zhang, Y. Dou, Y. Jiang and S. X. Dou, *Adv. Funct. Mater.*, 2016, **26**, 7479-7485, <https://doi.org/10.1002/adfm.201602933>.
- S3. F. Han, C. Y. J. Tan and Z. Gao, *Energy Technol.*, 2017, **5**, 580-587, <https://doi.org/10.1002/ente.201600393>.
- S4. J. Wang, D. Cao, G. Yang, Y. Yang and H. Wang, *J Solid State Electrochem.*, 2017, **21**, 3047-3055, <https://doi.org/10.1007/s10008-017-3600-9>.
- S5. Y. Zhang, C. Lv, X. Wang, S. Chen, D. Li, Z. Peng and D. Yang, *ACS Appl Mater Interfaces.*, 2018, **10**, 40531-40539, <https://doi.org/10.1021/acsami.8b13805>.
- S6. Q. Chen, S. Ni, J. Tang, T. Li, T. Kang and X. Yang, *Mater. Lett.*, 2018, **213**, 193-196, <https://doi.org/10.1016/j.matlet.2017.11.061>.
- S7. H. Xie, M. Chen and L. Wu, *ACS Appl Mater Interfaces.*, 2019, **11**, 41222-41228, <https://doi.org/10.1021/acsami.9b11078>.
- S8. G. Xia, X. Li, Y. Gu, P. Dong, Y. Zhang, J. Duan, D. Wang and Y. Zhang, *Ionics.*, 2020, **27**, 191-197, <https://doi.org/10.1007/s11581-020-03818-9>.
- S9. T. Li, H. Li, A. Qin, H. Wu, D. Zhang and F. Xu, *J. Power Sources*, 2020, **451**, 227796, <https://doi.org/10.1016/j.jpowsour.2020.227796>.
- S10. X. Zhao, F. Gong, Y. Zhao, B. Huang, D. Qian, H.-E. Wang, W. Zhang and Z. Yang, *Chem. Eng. J.*, 2020, **392**, <https://doi.org/10.1016/j.cej.2019.123675>.
